# Supplementary material for: Iron-catalyzed graphitization of biomass
Source: Royal Society of Chemistry journal article supplement (doi:10.1039/c4gc01673d), 2014-10-10
Supplement: c4gc01673d1.pdf [file c4gc01673d1.pdf]

## Iron catalyzed graphitization of biomass Supplementary Information

E. Thompson, A. Danks, L. Bourgeois and Z. Schnepf\*

### Supplementary experimental information

| Fe:Ca molar ratio | Volume of 10% Fe(NO <sub>3</sub> ) <sub>3</sub> ·9H <sub>2</sub> O solution (ml) | Volume 10% Ca(NO <sub>3</sub> ) <sub>2</sub> ·4H <sub>2</sub> O solution (ml) | Volume of water (ml) |
|-------------------|----------------------------------------------------------------------------------|-------------------------------------------------------------------------------|----------------------|
| 100:0             | 20                                                                               | 0                                                                             | 0                    |
| 75:25             | 15                                                                               | 2.92                                                                          | 2.08                 |
| 50:50             | 10                                                                               | 5.84                                                                          | 4.16                 |
| 25:75             | 5                                                                                | 8.77                                                                          | 6.23                 |
| 10:90             | 2                                                                                | 10.52                                                                         | 7.48                 |
| 0:100             | 0                                                                                | 11.69                                                                         | 8.31                 |

| Fe:Mg molar ratio | Volume of 10% Fe(NO <sub>3</sub> ) <sub>3</sub> ·9H <sub>2</sub> O solution (ml) | Volume 10% Mg(NO <sub>3</sub> ) <sub>2</sub> ·6H <sub>2</sub> O solution (ml) | Volume of water (ml) |
|-------------------|----------------------------------------------------------------------------------|-------------------------------------------------------------------------------|----------------------|
| 100:0             | 20                                                                               | 0                                                                             | 0                    |
| 75:25             | 15                                                                               | 3.17                                                                          | 1.83                 |
| 50:50             | 10                                                                               | 6.35                                                                          | 3.65                 |
| 25:75             | 5                                                                                | 9.52                                                                          | 5.48                 |
| 10:90             | 2                                                                                | 11.42                                                                         | 6.58                 |
| 0:100             | 0                                                                                | 12.69                                                                         | 7.31                 |

**Table S1** Full details of samples prepared from Fe/Ca and Fe/Mg. Final solution volume of 20 ml was added to 5 g of sawdust.

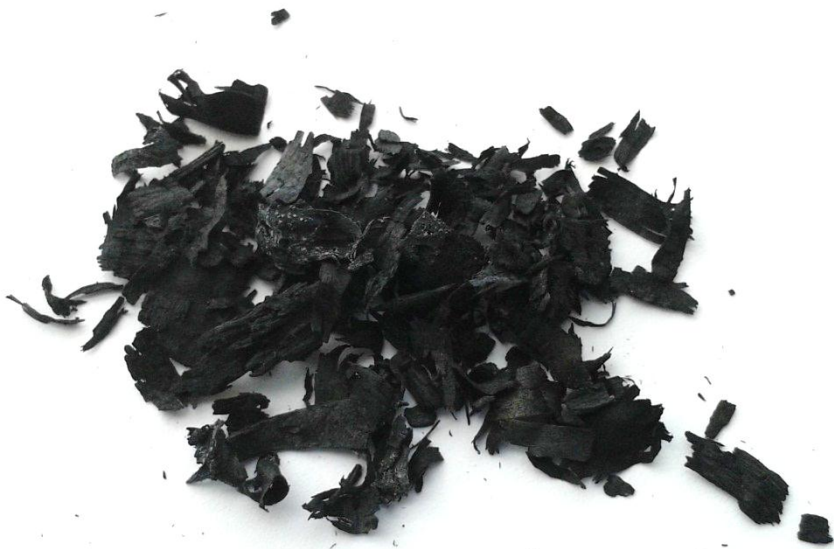

**Figure S1** Photograph of the carbonized sawdust, showing individual flakes of wood have maintained their shape.

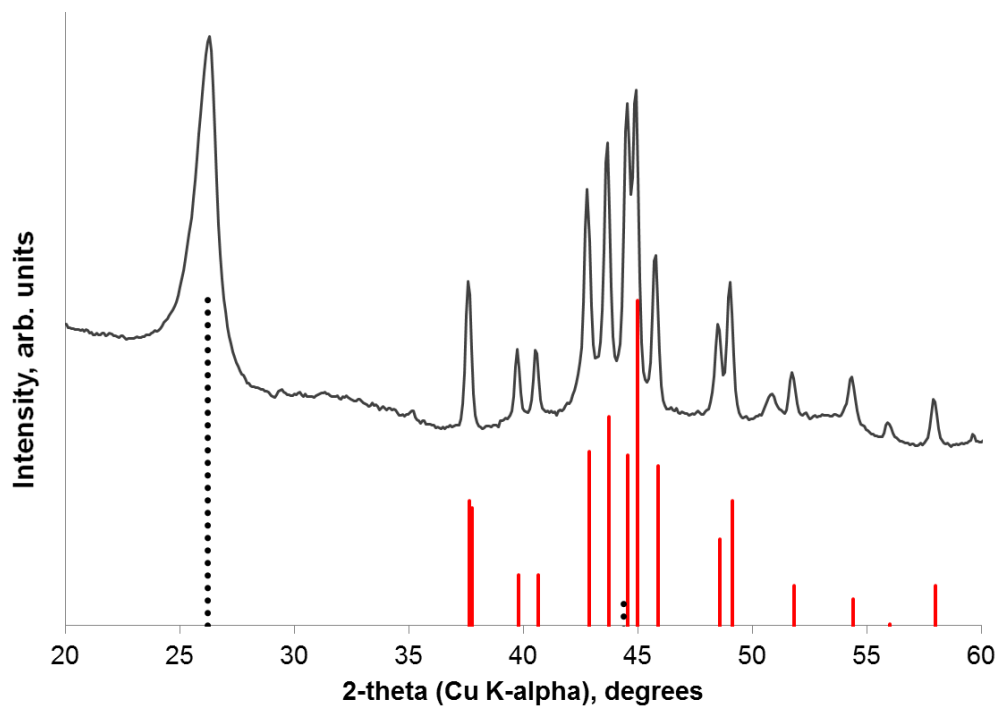

**Figure S2** Powder X-ray diffraction pattern of a sample prepared at a 1 litre scale showing the same crystallographic profile is achieved.

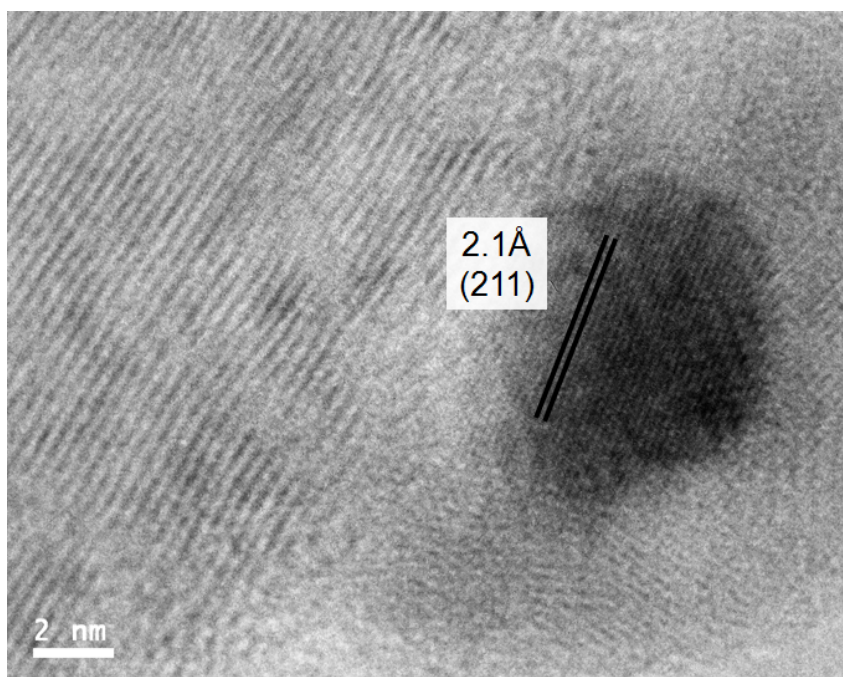

**Figure S3** TEM image of a nanoparticle with lattice planes assigned to  $\text{Fe}_3\text{C}$ .

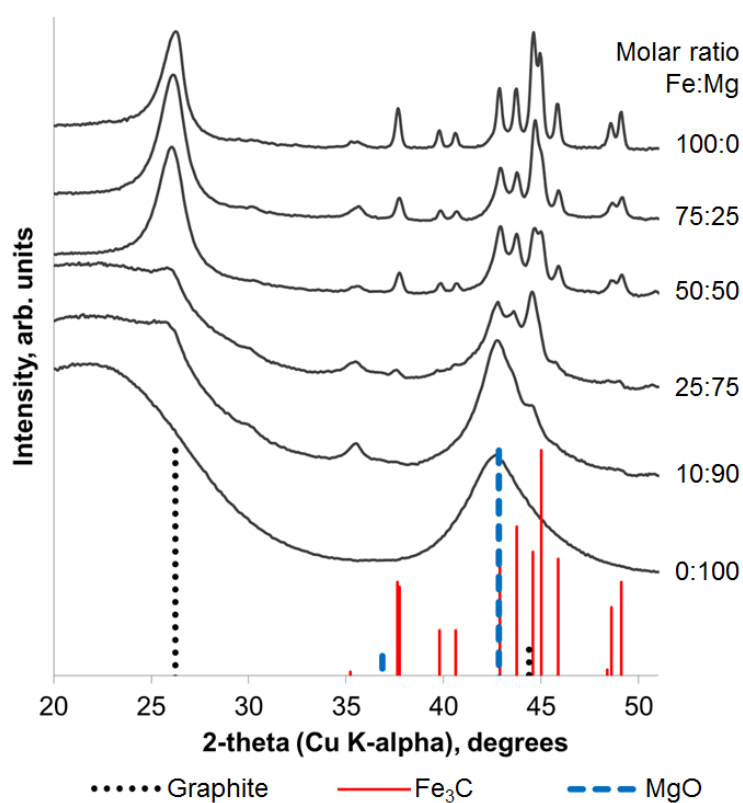

**Figure S4** Powder XRD patterns for samples prepared by carbonizing sawdust after soaking in a solution of iron and magnesium nitrates.

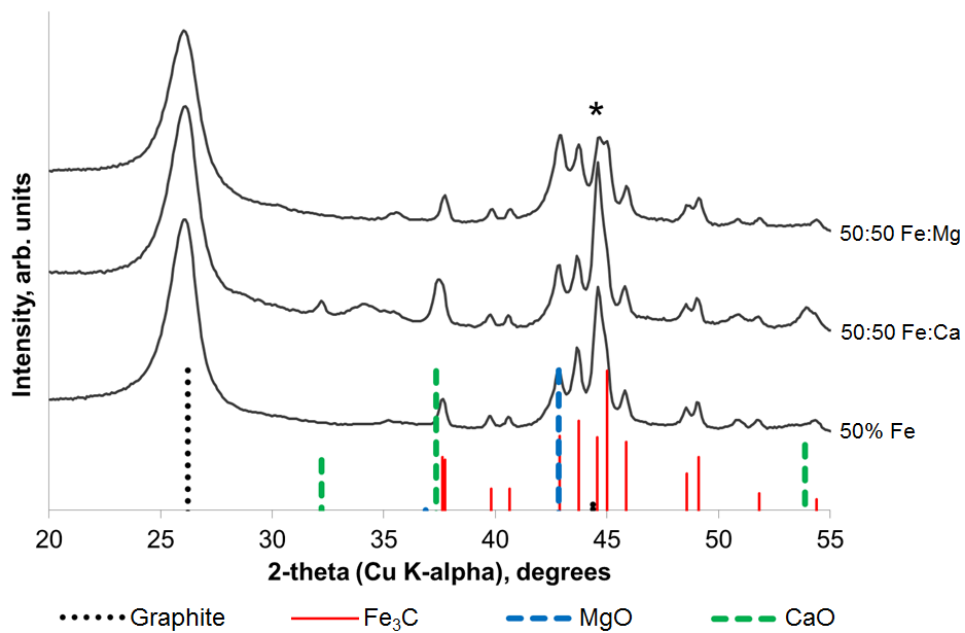

**Figure S5** Powder XRD patterns for samples prepared using 50% concentration iron nitrate and either water, calcium nitrate or magnesium nitrate (at 50:50 molar ratio for metals).
